# Supplementary material for: Aberrant Glycogen Synthase Kinase 3β Is Involved in Pancreatic Cancer Cell Invasion and Resistance to Therapy
Source: PLoS One. 2013 Feb 8;8(2):e55289. doi: 10.1371/journal.pone.0055289 (PMC3568118; doi:10.1371/journal.pone.0055289)
Supplement: Table S3 — Comparison of IC50 values of gemcitabine and a GSK3β inhibitor (AR-A014418) between pancreatic cancer cell lines (PANC-1, MIA PaCa-2 and BxPC-3). (DOC) [file pone.0055289.s006.doc]

**Supporting Table S3.** Comparison of IC50 values of gemcitabine and a GSK3β inhibitor (AR-A014418) between pancreatic cancer cell lines (PANC-1, MIA PaCa-2 and BxPC-3)

|  | IC50 | |
| --- | --- | --- |
| Cell lines | Gemcitabine (ng/mL) | AR-A014418 (μM) |
| PANC-1 | 163.5 | 13.2 |
| MIA PaCa-2 | 59.3 | 17.0 |
| BxPC-3 | 4.3 | 12.3 |

In each cell line, IC50 was calculated by measuring relative cell viability in the presence of PBS or escalating concentrations of gemcitabine for 72 hrs, and in the presence of DMSO or AR-A014418 at escalating concentrations for 72 hrs.
